CORRECTION

# Correction: ClassTR: Classifying Within-Host Heterogeneity Based on Tandem Repeats with Application to *Mycobacterium tuberculosis* Infections

The PLOS Computational Biology Staff

There is a typographical error in the legend for Figure 1.

The statement “they can result from either **d.** a clonally heterogeneous infection or **e.** a mixed infection” should instead read “they can result from either **d.** a mixed infection or **e.** a clonally heterogeneous infection”.

## Reference

1. Chindelevitch L, Colijn C, Moodley P, Wilson D, Cohen T (2016) ClassTR: Classifying Within-Host Heterogeneity Based on Tandem Repeats with Application to *Mycobacterium tuberculosis* Infections. PLoS Comput Biol 12(2): e1004475. doi:[10.1371/journal.pcbi.1004475](https://doi.org/10.1371/journal.pcbi.1004475) PMID: [26829497](https://pubmed.ncbi.nlm.nih.gov/26829497/)

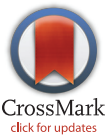

## OPEN ACCESS

**Citation:** The PLOS Computational Biology Staff (2016) Correction: ClassTR: Classifying Within-Host Heterogeneity Based on Tandem Repeats with Application to *Mycobacterium tuberculosis* Infections. PLoS Comput Biol 12(2): e1004806. doi:[10.1371/journal.pcbi.1004806](https://doi.org/10.1371/journal.pcbi.1004806)

**Published:** February 29, 2016

**Copyright:** © 2016 The PLOS Computational Biology Staff. This is an open access article distributed under the terms of the [Creative Commons Attribution License](https://creativecommons.org/licenses/by/4.0/), which permits unrestricted use, distribution, and reproduction in any medium, provided the original author and source are credited.
